# Supplementary material for: CD27 expression discriminates porcine T helper cells with functionally distinct properties
Source: PubMed Central journal article supplement (PMC3610194; doi:10.1186/1297-9716-44-18), 2013-03-11
Supplement: 1297-9716-44-18-S1.pdf [file 1297-9716-44-18-S1.pdf]

## Additional file 1 Optimization and validation of qPCR for CD62L and CX3CR1

| Target | Product melt.temp. (°C) | Exon junctions in | Intron size (bp) |
|--------|-------------------------|-------------------|------------------|
| CD62L  | 88.0                    | product           | 885/1,816        |
| CX3CR1 | 87.5                    | product           | 10,756           |

Product melting temperature (°C) and length of intron in base pairs (bp).

Products were spanning over exon junctions.

| Target | Annealing temp./time (°C/s) | Extension temp./time (°C/s) | $\Delta C_t$ (RT+ to RT-) | Slope  | Correlation coefficient (Pearson) $R^2$ | Verified dynamic range |
|--------|-----------------------------|-----------------------------|---------------------------|--------|-----------------------------------------|------------------------|
| CD62L  | 60/30                       | 72/20                       | >13                       | -3.448 | 0.999                                   | $10^6$                 |
| CX3CR1 | 70/30                       | 72/30                       | >15                       | -3.309 | 0.999                                   | $10^7$                 |

Optimized protocol for the amplification of target sequences.

### CD62L (1:10 serial dilution of PCR product)

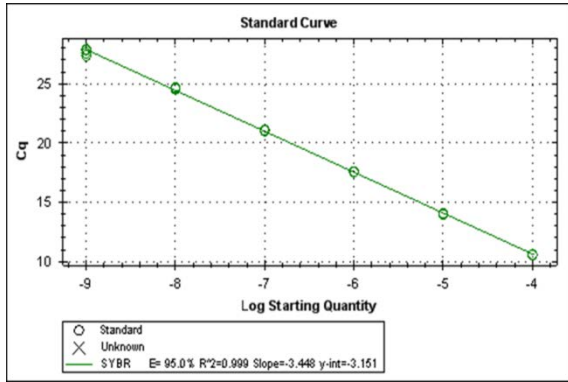

calibration curve

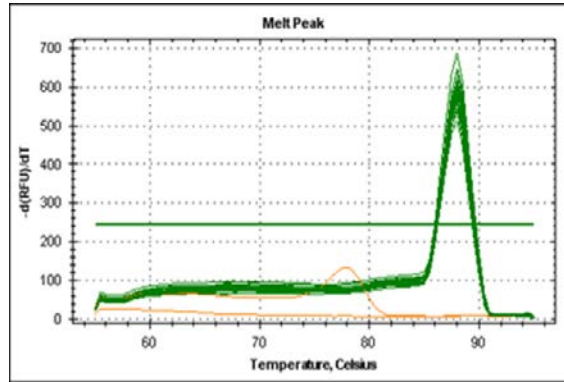

melt curve

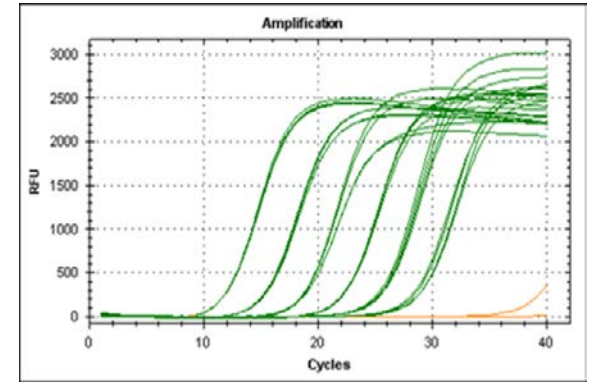

amplification plot

### CX3CR1 (1:2 serial dilution of cDNA pool)

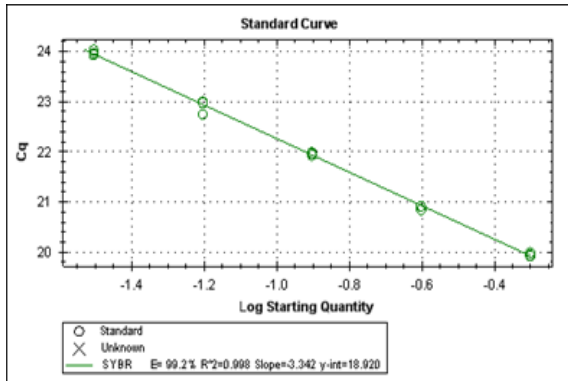

calibration curve

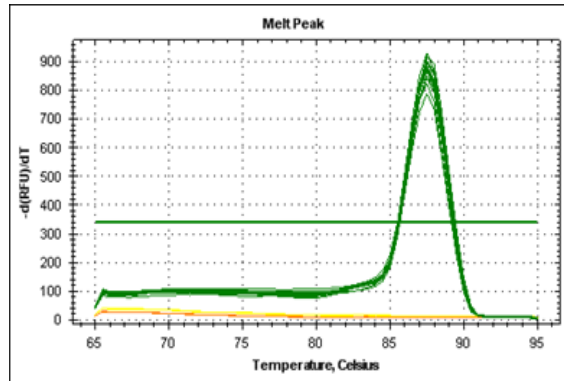

melt curve

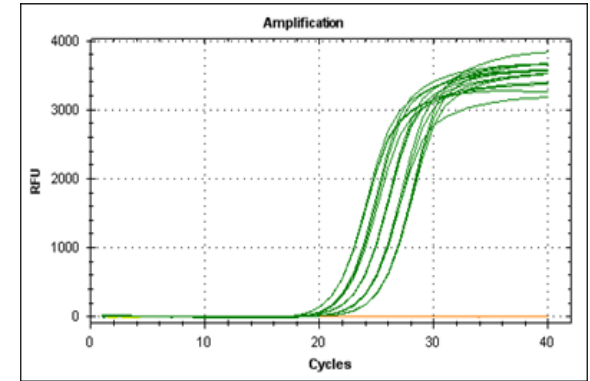

amplification plot
