# Supplementary material for: CD27 expression discriminates porcine T helper cells with functionally distinct properties
Source: PubMed Central journal article supplement (PMC3610194; doi:10.1186/1297-9716-44-18), 2013-03-11

# Additional file 2 Time course study of IFN- $\gamma$ , TNF- $\alpha$ and IL-2 production in CD27-sorted T helper cells

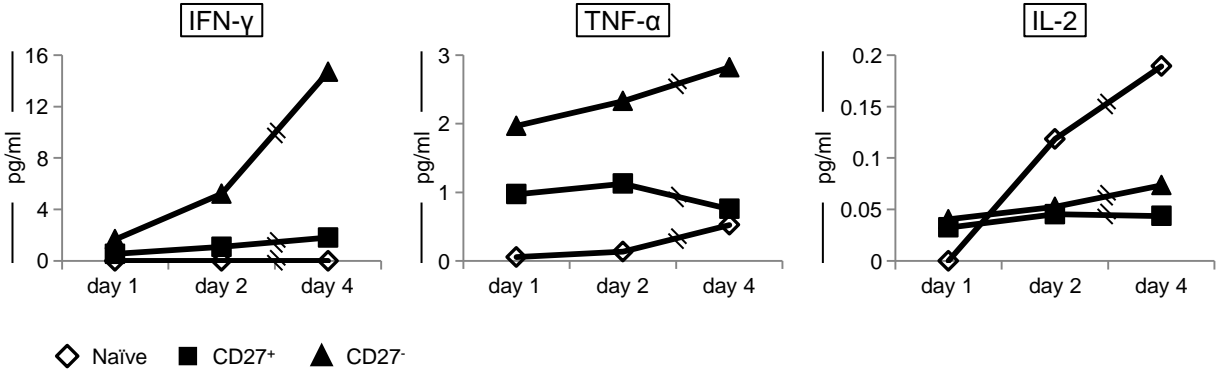

Supplement: 1297-9716-44-18-S2.pdf [file 1297-9716-44-18-S2.pdf]
