# Supplementary material for: CD27 expression discriminates porcine T helper cells with functionally distinct properties
Source: PubMed Central journal article supplement (PMC3610194; doi:10.1186/1297-9716-44-18), 2013-03-11
Supplement: 1297-9716-44-18-S3.pdf [file 1297-9716-44-18-S3.pdf]

# Additional file 3 Binding region of anti-CCR7 mAb

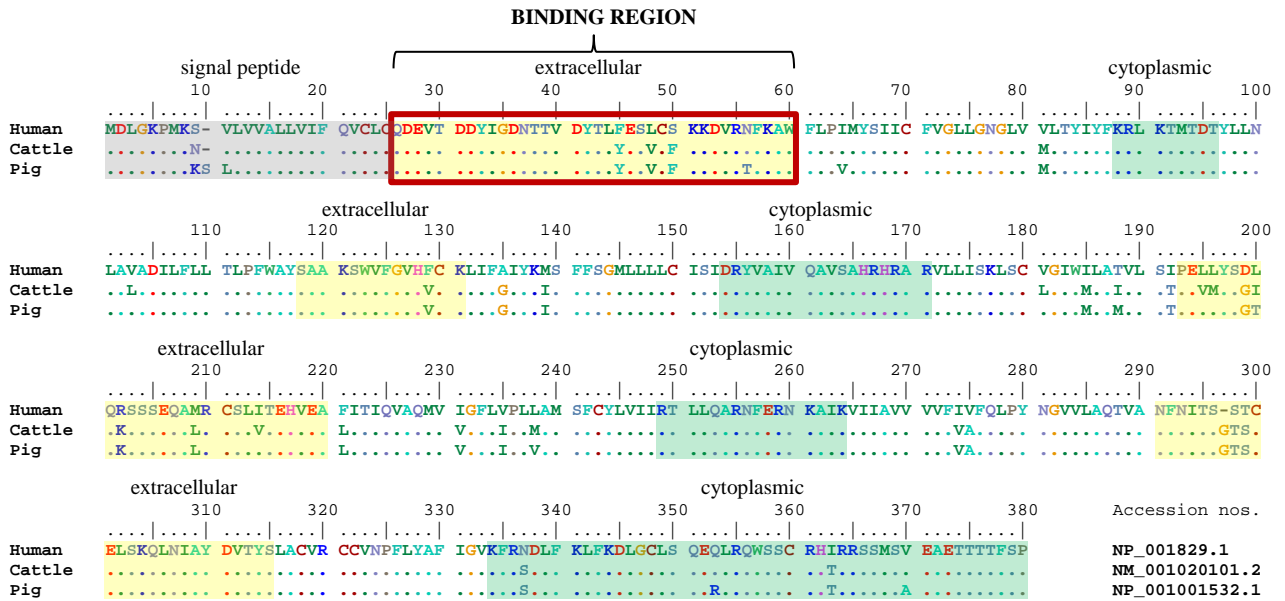

| Species | aa homology (%) | aa length |
|---------|-----------------|-----------|
| Human   | 100             | 378       |
| Cattle  | 95.0            | 379       |
| Pig     | 93.7            | 380       |
