# Supplementary material for: CD27 expression discriminates porcine T helper cells with functionally distinct properties
Source: PubMed Central journal article supplement (PMC3610194; doi:10.1186/1297-9716-44-18), 2013-03-11

**Additional file 4** CD45RC expression on thymocytes

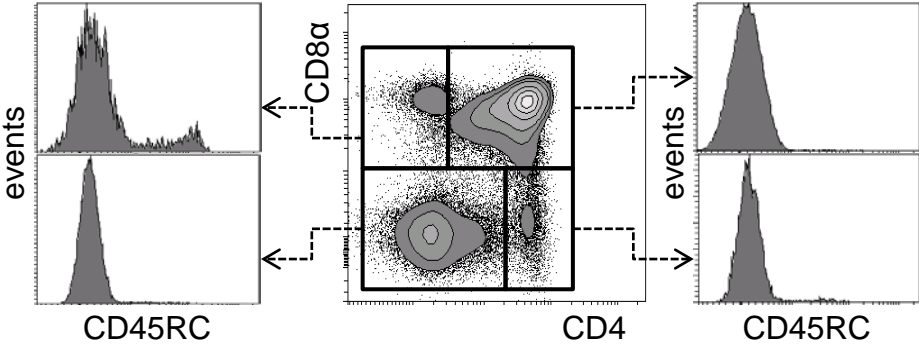

Supplement: 1297-9716-44-18-S4.pdf [file 1297-9716-44-18-S4.pdf]
